# Supplementary material
Source: Springer Nature journal article supplement (https://www.springermedizin.de/resource/supplementary/12885_2012_3791_MOESM5_ESM.pdf/9464416)

### A : Radiation quality

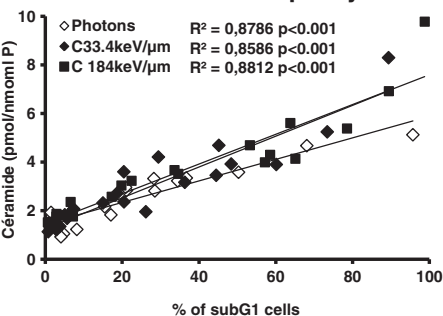

### B : Radiosensitivity

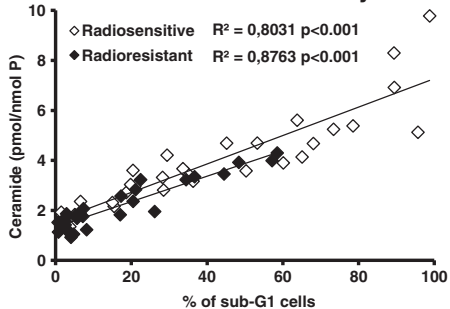

### C : p53 status

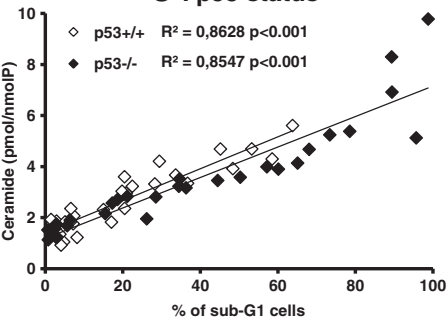

### D : Early and late apoptosis

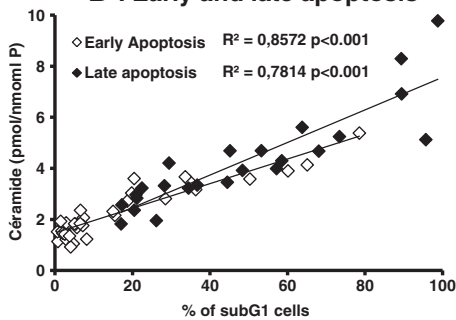

Supplement: MOESM5 [file 9464416]
